# Supplementary material for: Simultaneous enhancement of the energy storage, transparency, and hardness properties of K 0.5 Na 0.5 NbO 3 -based ceramics via a synergistic optimization strategy
Source: Royal Society of Chemistry journal article supplement (doi:10.1039/d5ta06456b), 2025-01-01
Supplement: d5ta06456b1.pdf [file d5ta06456b1.pdf]

## Supporting Information

### **Simultaneously enhance the energy storage, transparency, and hardness properties of $K_{0.5}Na_{0.5}NbO_3$ -based ceramics via synergistic optimization strategy**

Chenxi Liu<sup>1</sup>, Zhonghua Dai<sup>1\*</sup>, Yuanyuan Zheng<sup>1</sup>, Xujun Li<sup>1</sup>, Ruijian Dai<sup>2</sup>, Yuxing Liu<sup>3</sup>, Weiguo Liu<sup>1</sup>, Shun Zhou<sup>1\*</sup>, Shuitao Gu<sup>4\*</sup>, Minxia Fang<sup>5</sup>, Xiaobing Ren<sup>6, 7</sup>

<sup>1</sup> School of Opto-electronical Engineering, Xi'an Technological University, Xi'an 710032, China;

<sup>2</sup> School of Engineering Sciences, University of Tsukuba, Tsukuba, Ibaraki 305-8577, Japan;

<sup>3</sup> Department of Materials Science and Engineering, Institute of Science Tokyo, Meguro-ku, Tokyo 152-8550, Japan;

<sup>4</sup> School of Civil Engineering, Chongqing University, Chongqing 400044, China;

<sup>5</sup> School of Physics, Xi'an Jiaotong University, MOE Key Lab Nonequilibrium Synth & Modulat Condens, Xi'an 710049, China;

<sup>6</sup> Center for Smart Materials, Yongjiang Laboratory, Ningbo, 315201 China;

<sup>7</sup> Frontier Institute for Science and Technology, Xi'an Jiaotong University, Xi'an, 714009, China.

Corresponding Authors: [zhdai@mail.xjtu.edu.cn](mailto:zhdai@mail.xjtu.edu.cn); [zsemail@126.com](mailto:zsemail@126.com); [gust@cqu.edu.cn](mailto:gust@cqu.edu.cn)

X-ray photoelectron spectroscopy (XPS) provides robust support for understanding material mechanisms and optimizing preparation processes by detecting information such as the elemental composition and electronic structure of ceramic surfaces.<sup>1,2</sup> Fig. 1 shows the XPS test results for  $(1-x)KNN-xBZN$  ( $x=0.1, 0.125, 0.15, 0.175$ ) ceramics. The full spectrum in Fig. 1(a) confirmed the existence of elements of K, Na, Nb, O, Zn, and Bi. Fig. 1(b) shows the O 1s spectrum of KNN- $x$ BZN ceramics measured by XPS. The O 1s spectrum can be resolved into three binding energy peaks, corresponding respectively to lattice oxygen ( $O_L$ , ~529 eV), oxygen vacancies ( $O_V$ , ~531 eV), and surface-adsorbed oxygen ( $O_A$ , ~532 eV). The relative area of the  $O_V$  peak permits semi-quantitative analysis of oxygen vacancy concentration. Fig. 1(b) indicates that the relative area of the  $O_V$  peak generally decreases with increasing

doping concentration, suggesting that BZN doping effectively suppresses oxygen vacancy formation. This is typically associated with enhanced microstructural density in ceramics. A low oxygen vacancy concentration favors reduced leakage conductance, thereby enhancing the material's breakdown field strength. However, the oxygen vacancy concentration reaches its maximum proportion at a doping concentration of  $x = 0.175$ . This may be attributed to excessive doping causing Bi element volatilization and exacerbating the non-equivalent substitution effect of B-site ions, thereby introducing additional charge-compensating oxygen vacancies.

The above content is included in the supporting information for the manuscript.

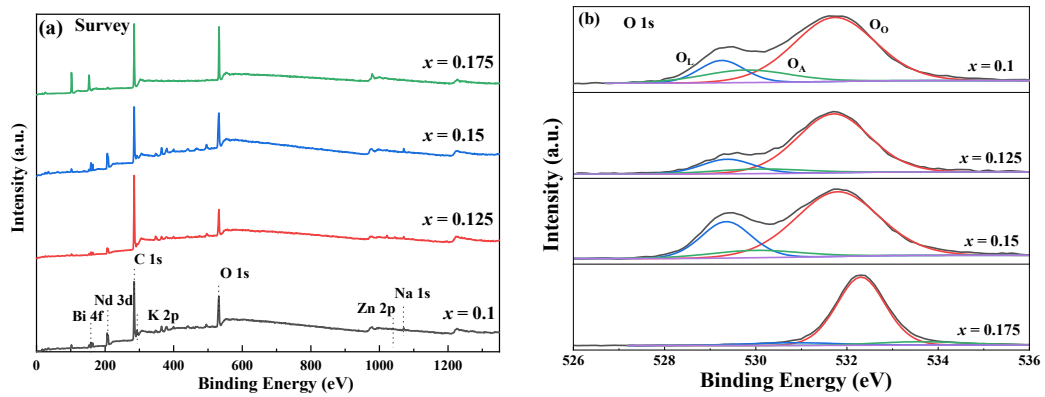

Fig. 1 (a) XPS survey of (1-x)KNN-xBZN ( $x=0.1, 0.125, 0.15, 0.175$ ) ceramics. (b) XPS O 1s spectra of (1-x)KNN-xBZN ( $x=0.1, 0.125, 0.15, 0.175$ ) ceramics.

## REFERENCE

- 1 Z. Li, M. Xiao, Q. Cao, C. Guo, M. Yu, D. Peng, Q. Hua, Y. Chen, Y. Lan and Z. Xing, *Small*, 2025, e05568.
- 2 W. Li, M. Xiao, J. Jiang, Y. Li, X. Zhang, S. Li, X. Lin, D. Peng, S. W. Or, S. Sun and Z. Xing, *Nano Energy*, 2025, **142**, 111140.
